# Supplementary material
Source: PubMed Central journal article supplement (PMC2258311)
Supplement: mmc1.pdf [file mmc1.pdf]

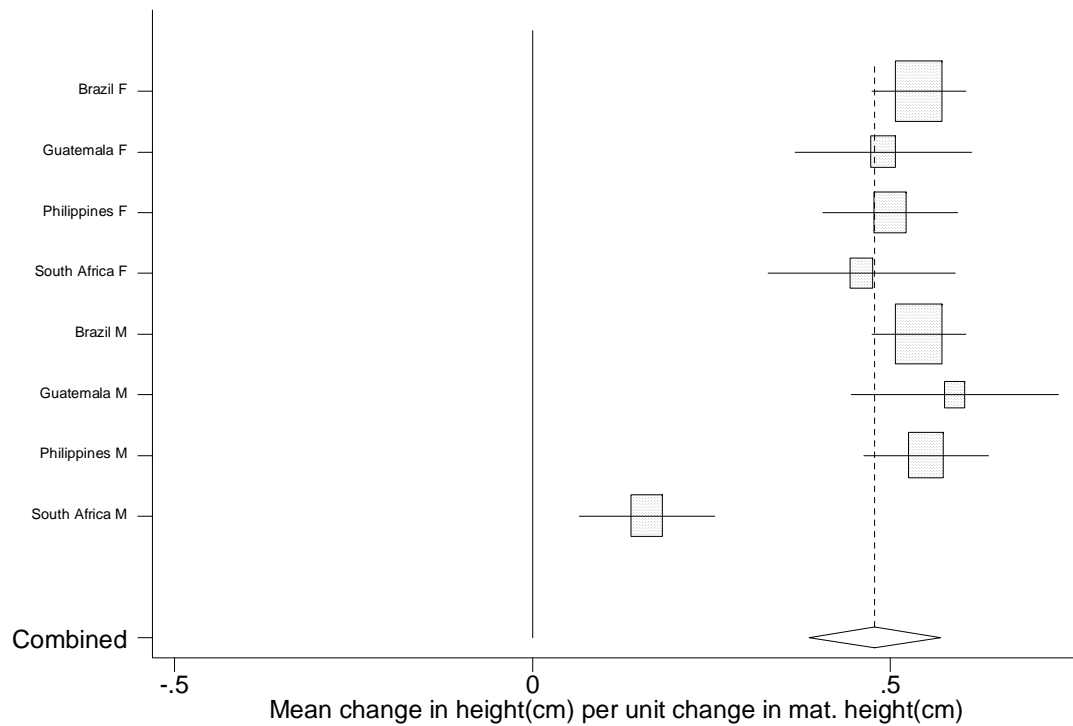

Webfigure 1a. Effect of maternal height on attained height in adulthood – meta-analyses of four studies stratified by sex.

P value <0.001 (random effects)

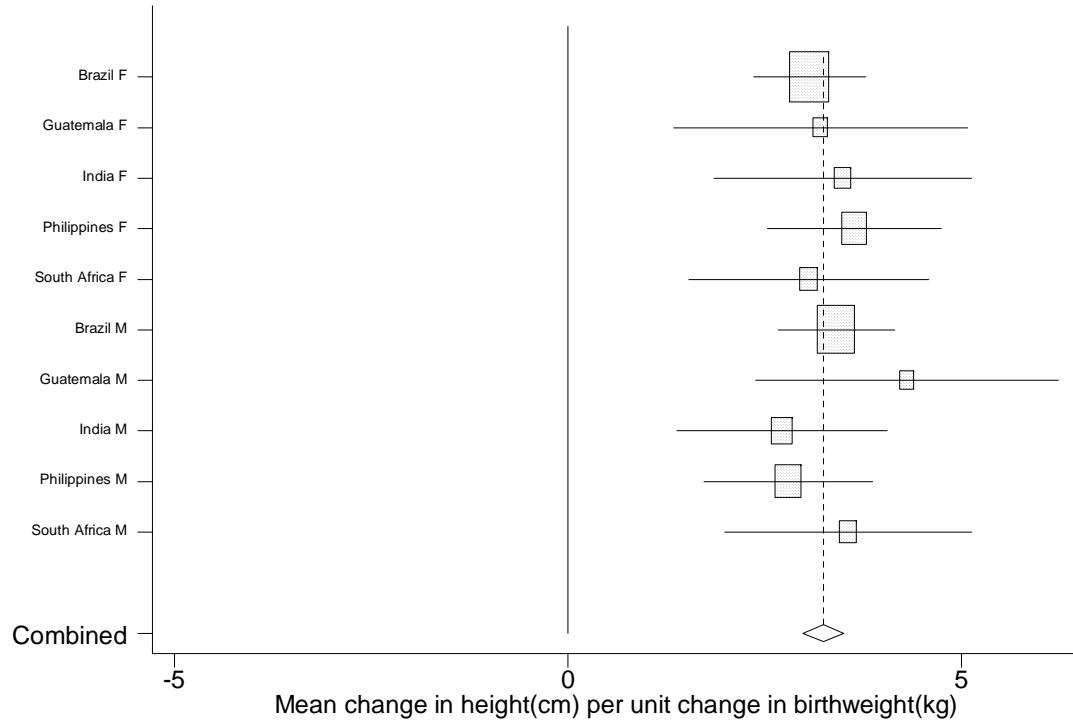

Webfigure 1b. Effect of birthweight on attained height in adulthood – meta-analyses of five studies stratified by sex.

P value <0.001 (fixed effects)

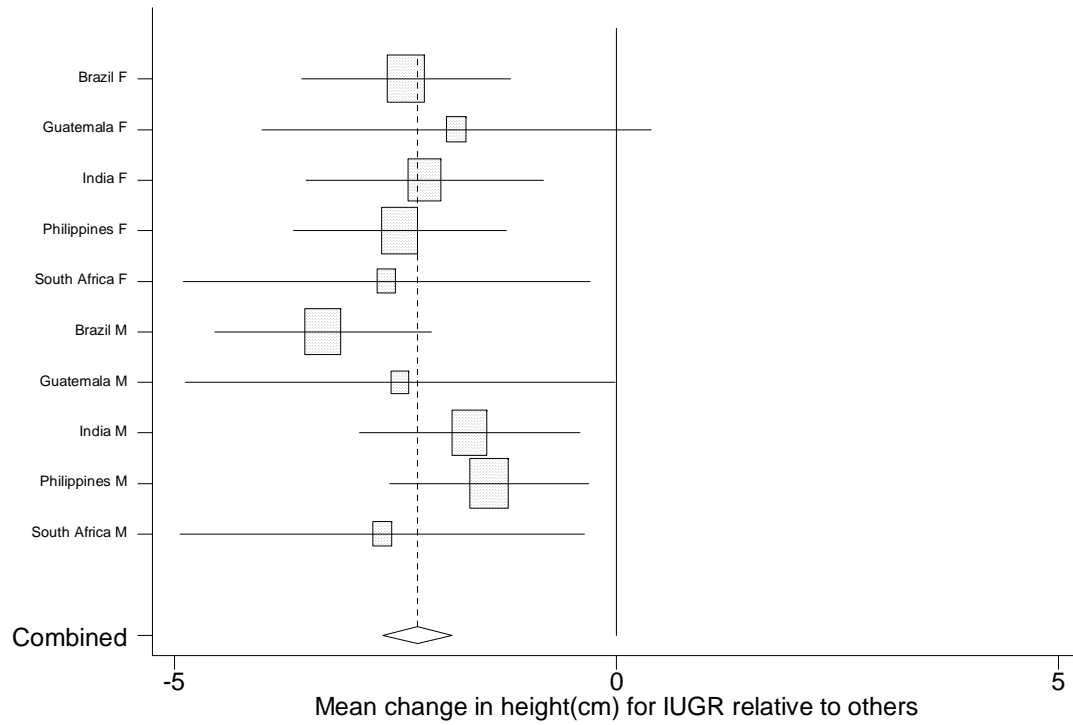

Webfigure 1c. Effect of intrauterine growth retardation on attained height in adulthood – meta-analyses of five studies stratified by sex.

P value <0.001 (fixed effects)

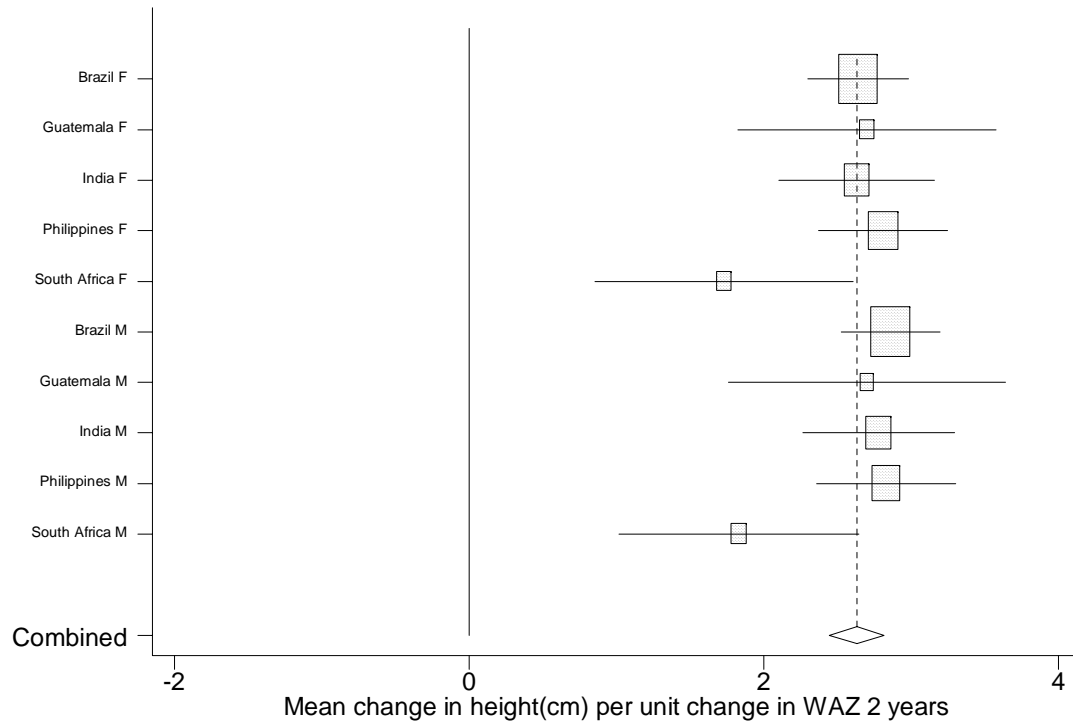

Webfigure 1d. Effect of weight for age Z-score at 2 years on attained height in adulthood – meta-analyses of five studies stratified by sex.

P value <0.001 (random effects)

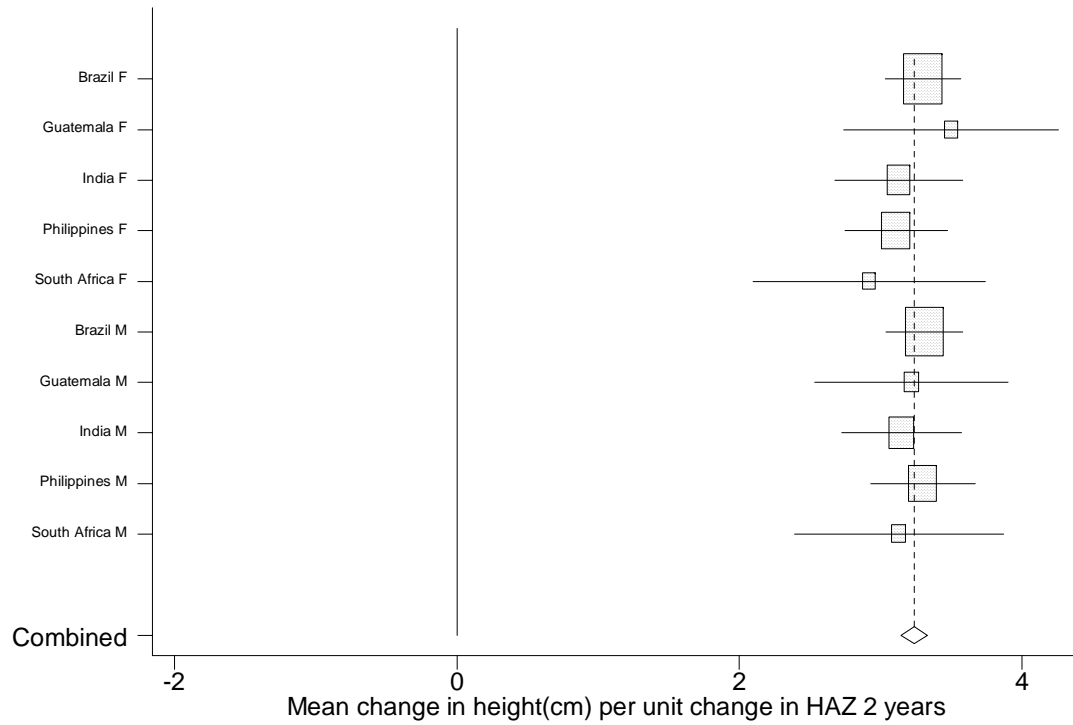

Webfigure 1e. Effect of height for age Z-score at 2 years on attained height in adulthood – meta-analyses of five studies stratified by sex.

P value <0.001 (fixed effects)

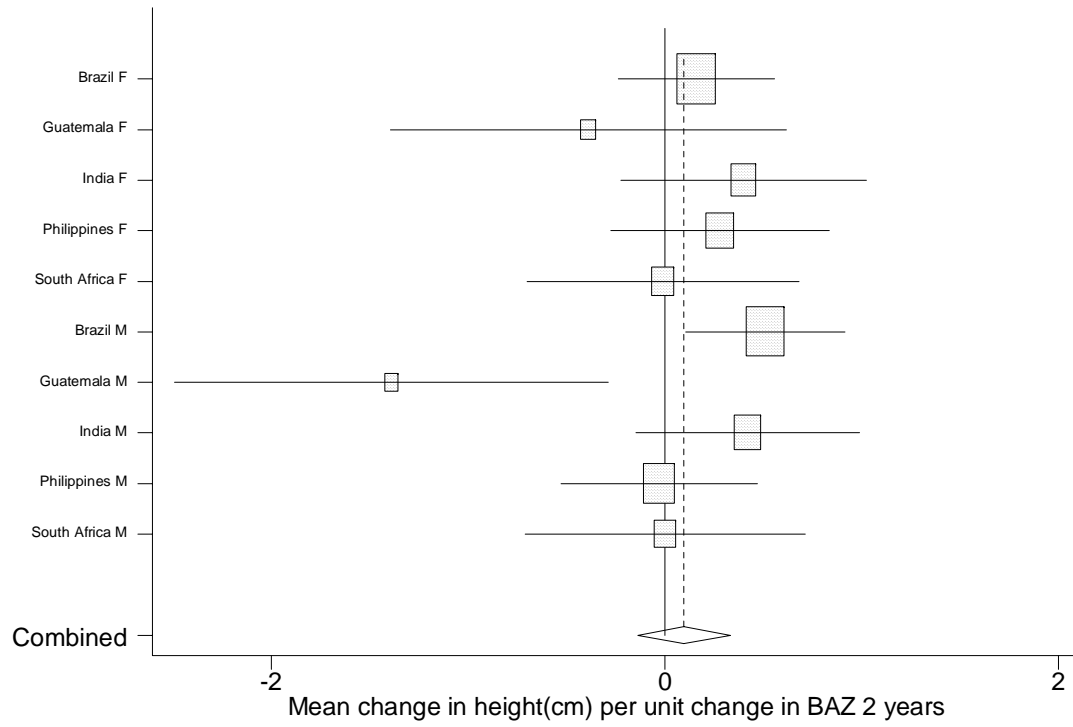

Webfigure 1f. Effect of body mass index for age Z-score at 2 years on attained height in adulthood – meta-analyses of five studies stratified by sex.

P value = 0.423 (random effects)
