# Supplementary material
Source: PubMed Central journal article supplement (PMC2258311)
Supplement: mmc2.pdf [file mmc2.pdf]

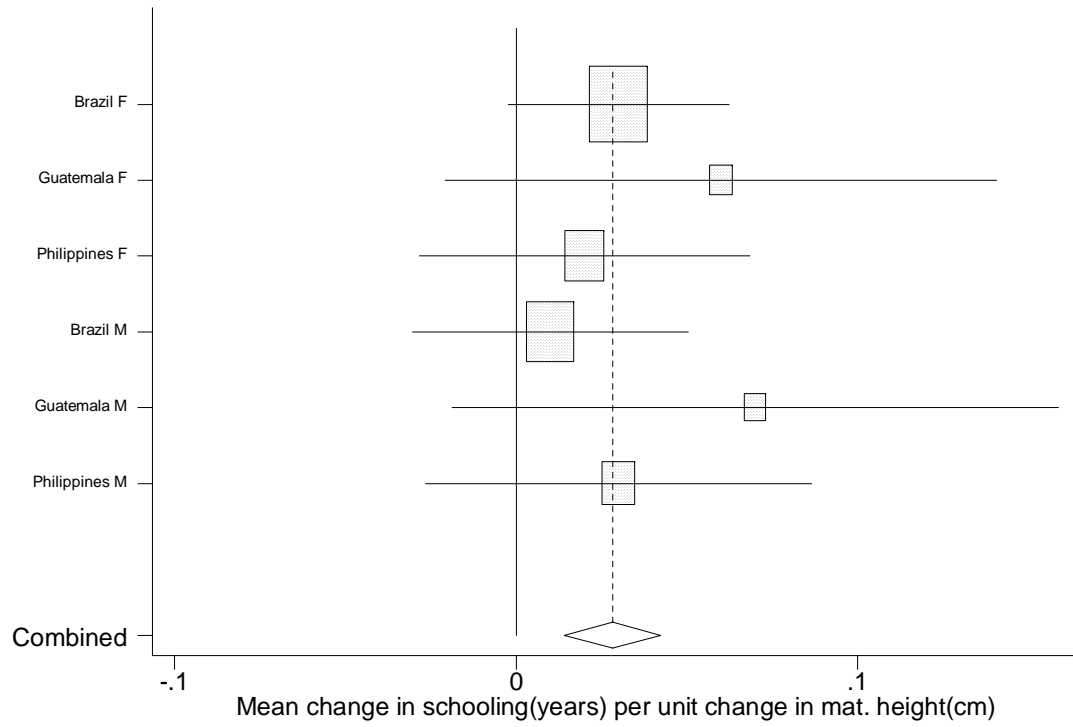

Webfigure 2a. Effect of maternal height on schooling in adulthood – meta-analyses of three studies stratified by sex.

P value < 0.001 (fixed effects)

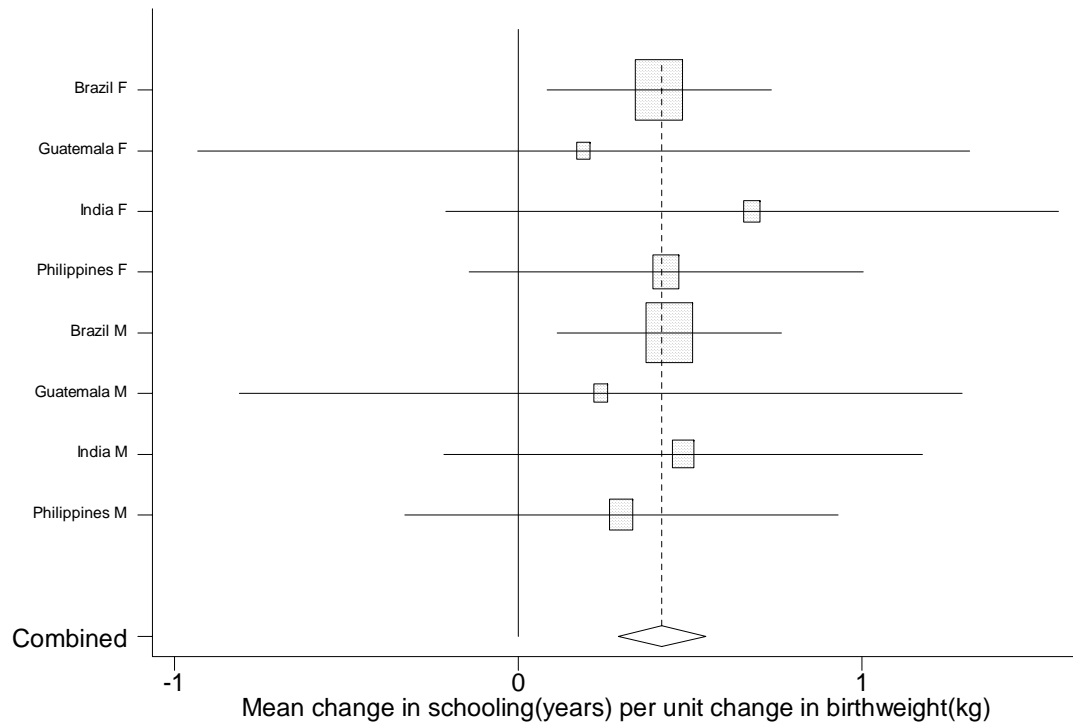

Webfigure 2b. Effect of birthweight on schooling in adulthood – meta-analyses of four studies stratified by sex.

P value < 0.001 (fixed effects)

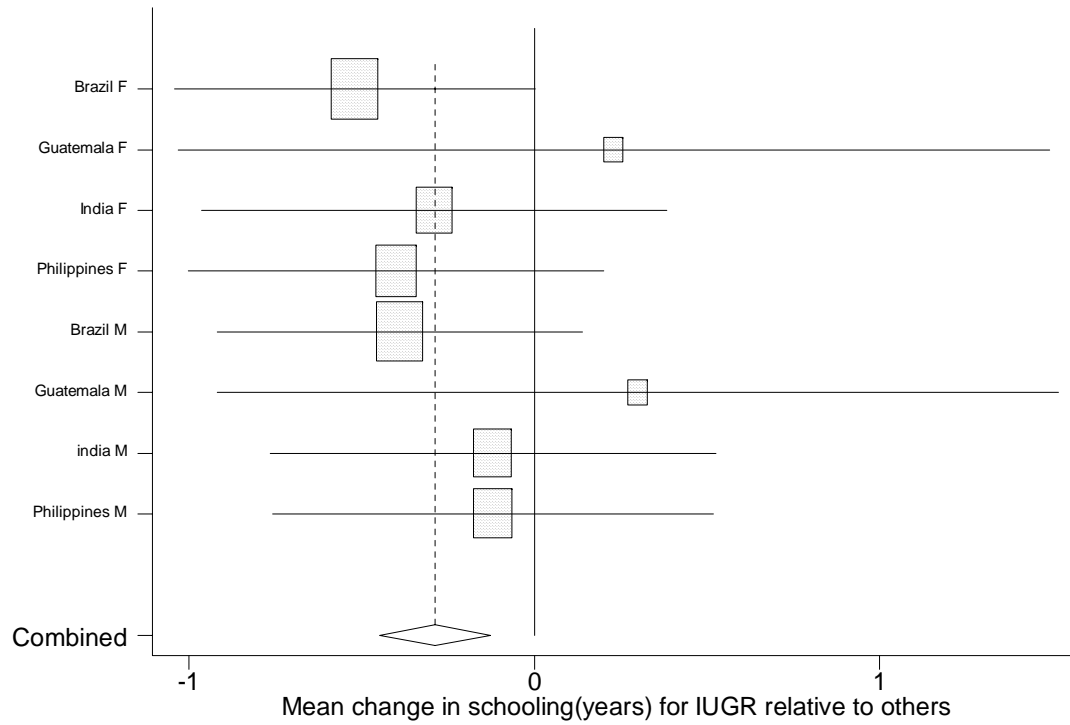

Webfigure 2c. Effect of intrauterine growth retardation on schooling in adulthood – meta-analyses of four studies stratified by sex.

P value < 0.001 (fixed effects)

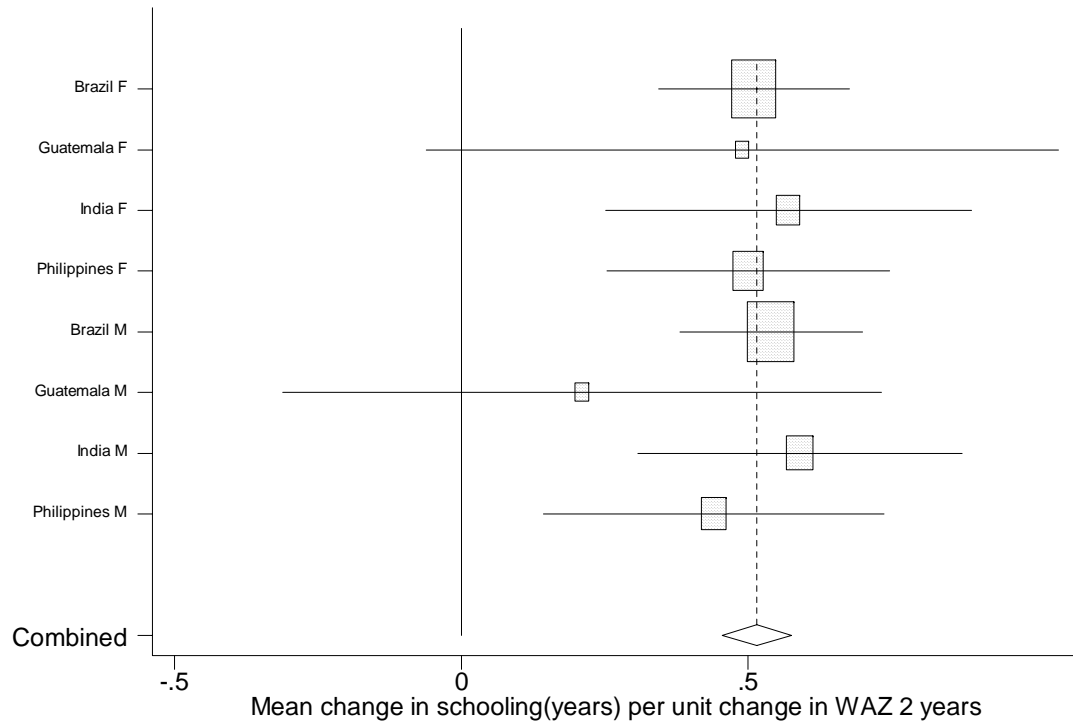

Webfigure 2d. Effect of weight for age Z-score at 2 years on schooling in adulthood – meta-analyses of four studies stratified by sex.

P value < 0.001 (fixed effects)

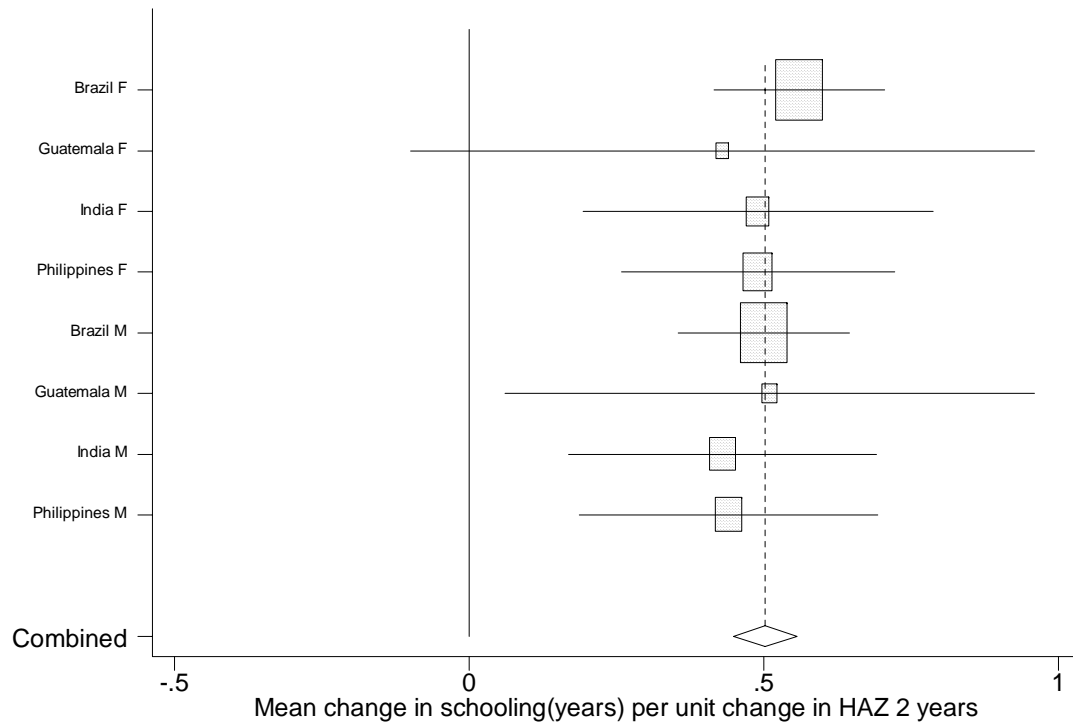

Webfigure 2e. Effect of height for age Z-score at 2 years on schooling in adulthood – meta-analyses of four studies stratified by sex.

P value < 0.001 (fixed effects)

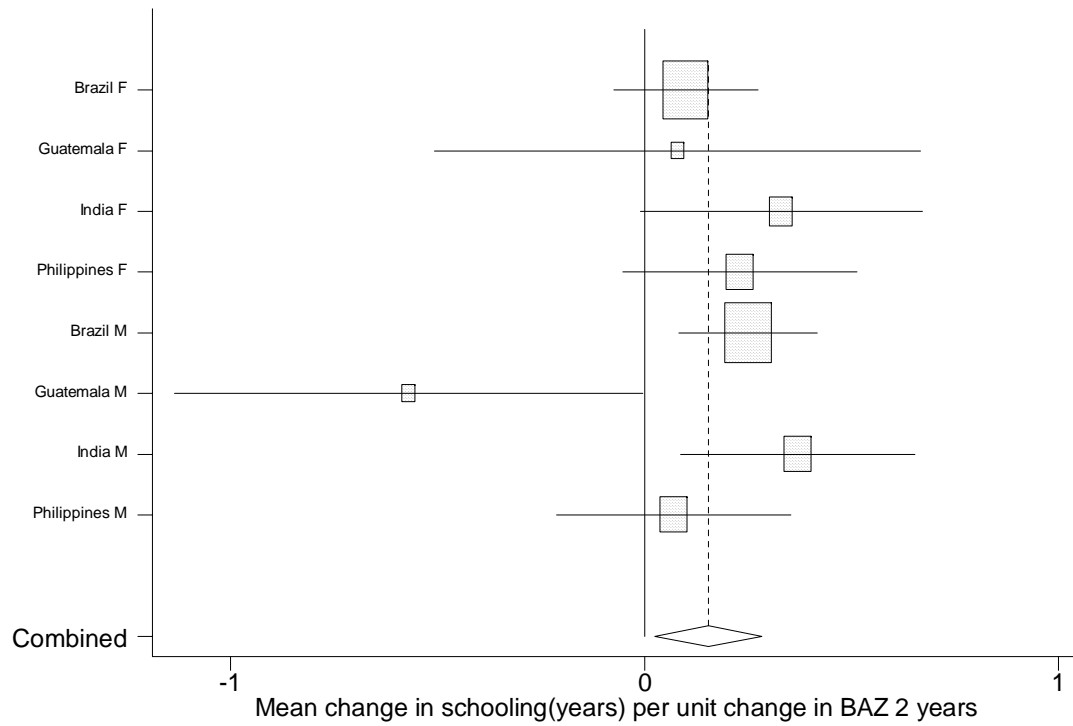

Webfigure 2f. Effect of body mass index for age Z-score at 2 years on schooling in adulthood – meta-analyses of four studies stratified by sex.

P value = 0.019 (random effects)
