# Supplementary material
Source: PubMed Central journal article supplement (PMC2258311)
Supplement: mmc3.pdf [file mmc3.pdf]

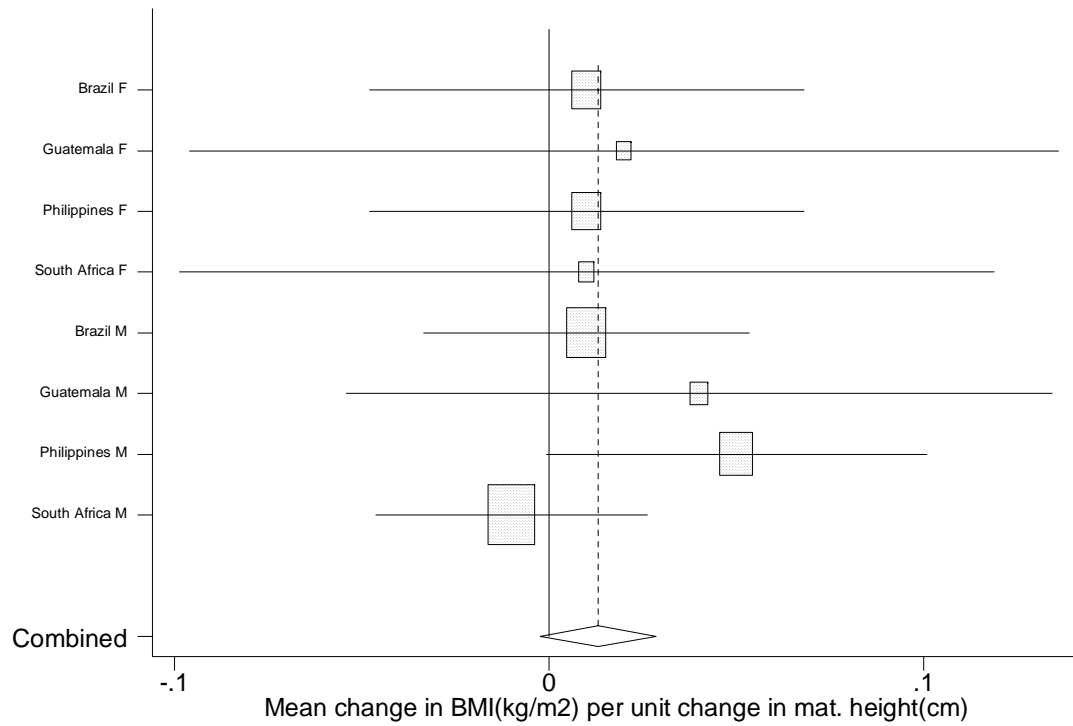

Webfigure 3a. Effect of maternal height on body mass index in adulthood – meta-analyses of four studies stratified by sex.

P value = 0.092 (fixed effects)

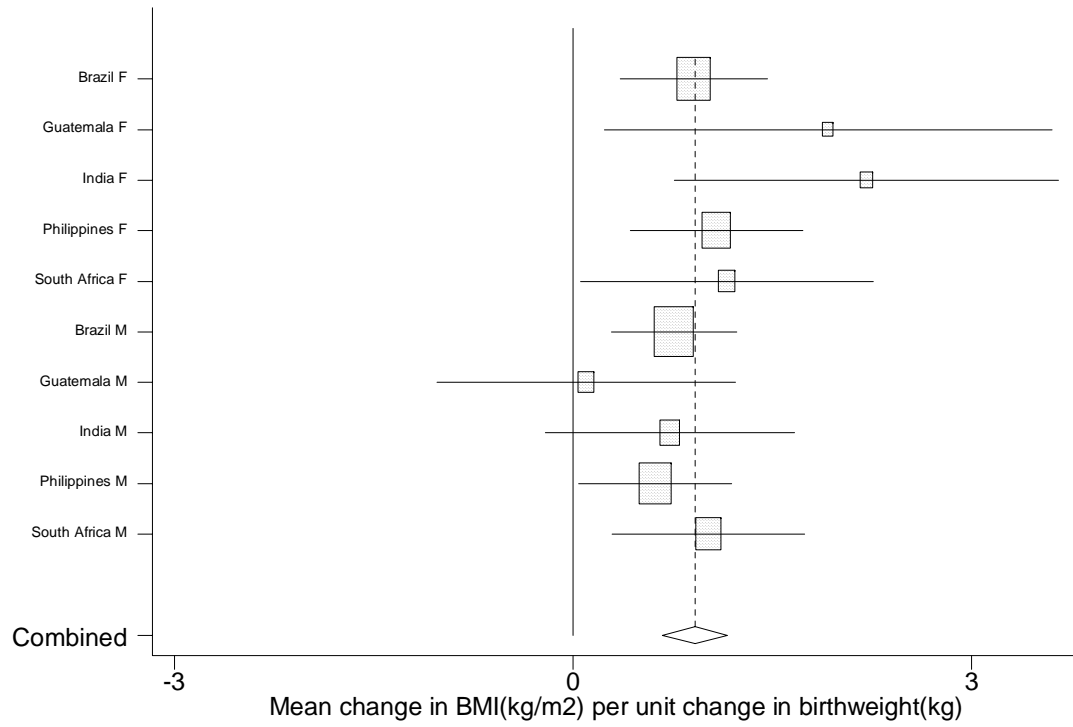

Webfigure 3b. Effect of birthweight on body mass index in adulthood – meta-analyses of five studies stratified by sex.

P value < 0.001 (fixed effects)

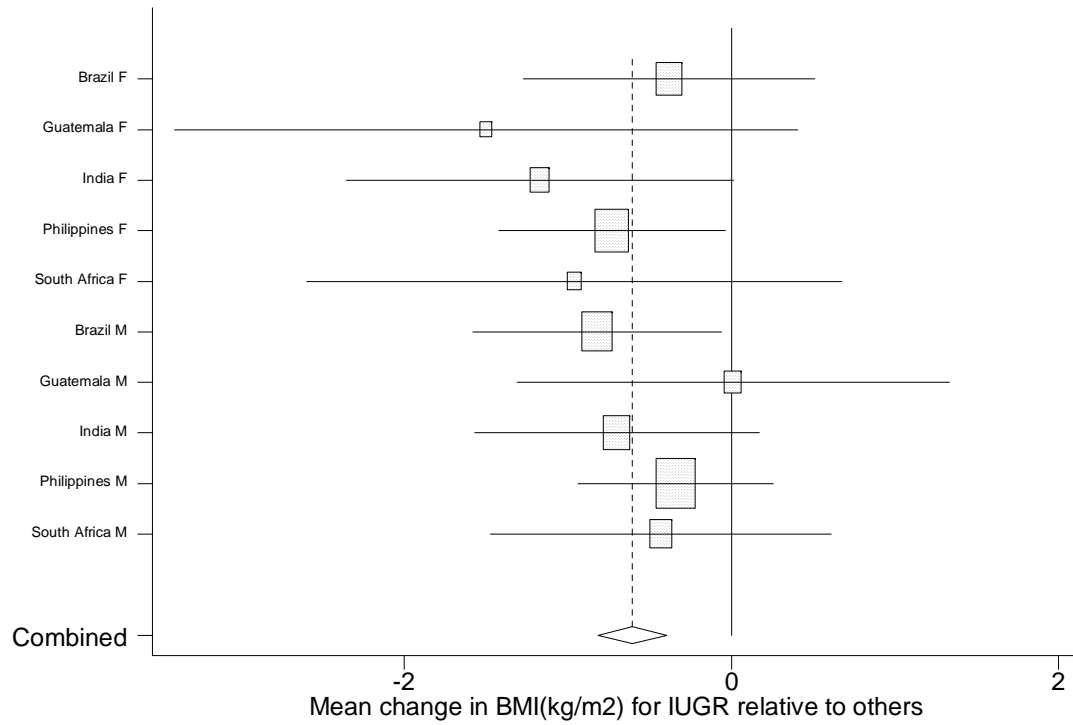

Webfigure 3c. Effect of intrauterine growth retardation on body mass index in adulthood – meta-analyses of five studies stratified by sex.

P value < 0.001 (fixed effects)

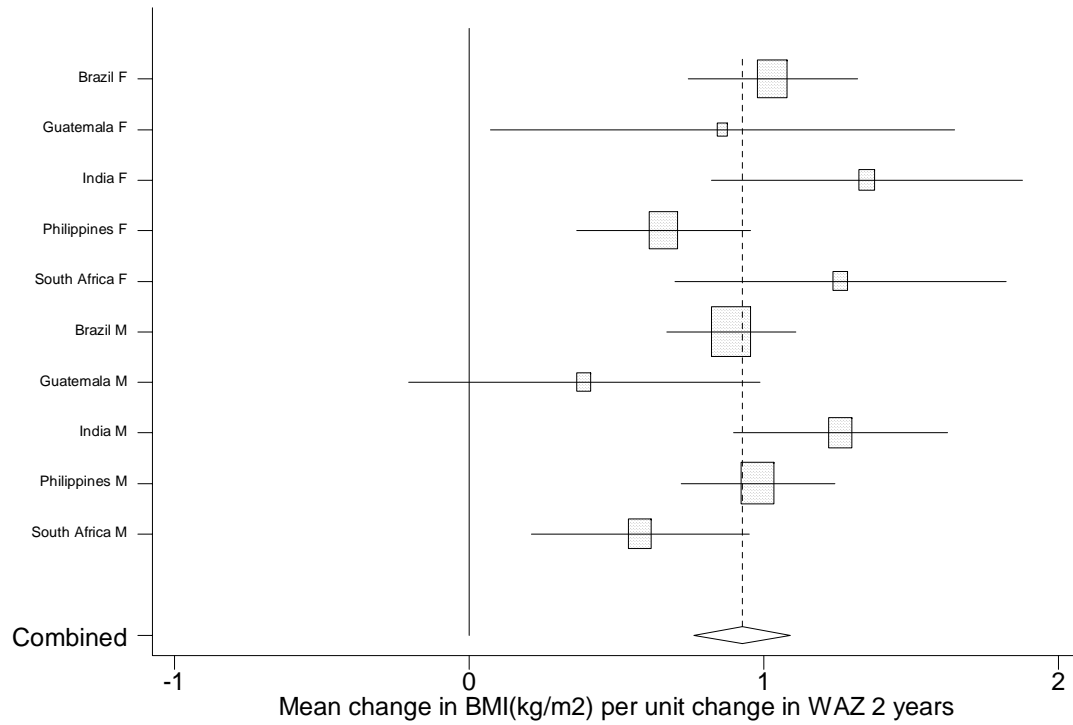

Webfigure 3d. Effect of weight for age Z-score at 2 years on body mass index in adulthood – meta-analyses of five studies stratified by sex.

P value < 0.001 (random effects)

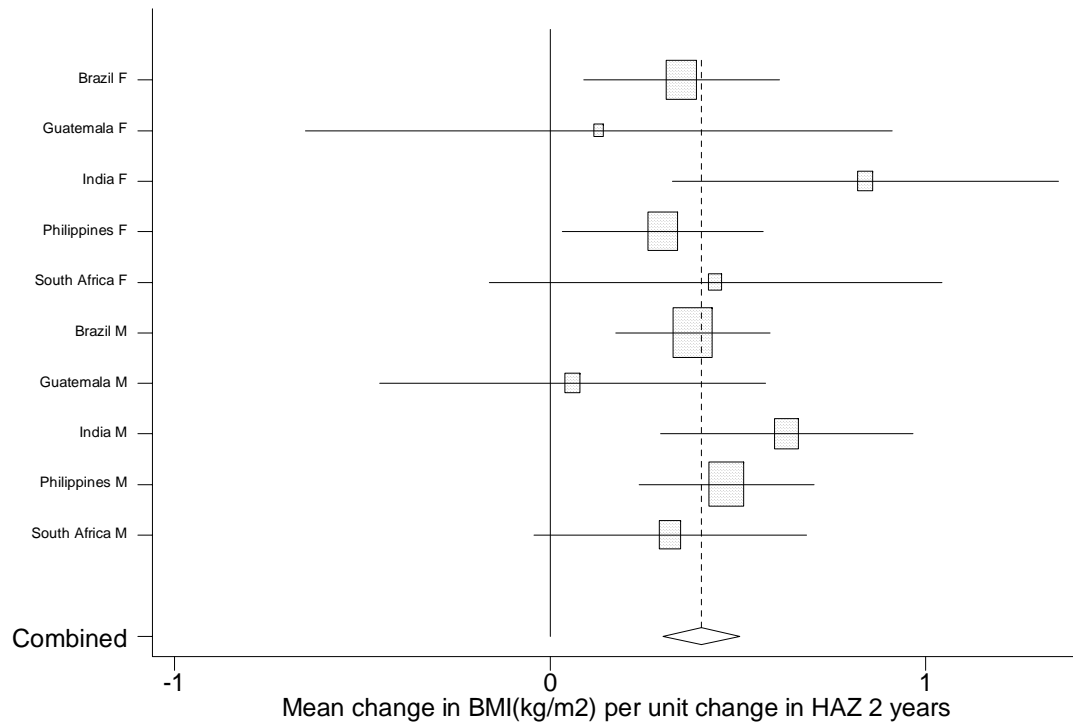

Webfigure 3e. Effect of height for age Z-score at 2 years on body mass index in adulthood – meta-analyses of five studies stratified by sex.

P value < 0.001 (fixed effects)

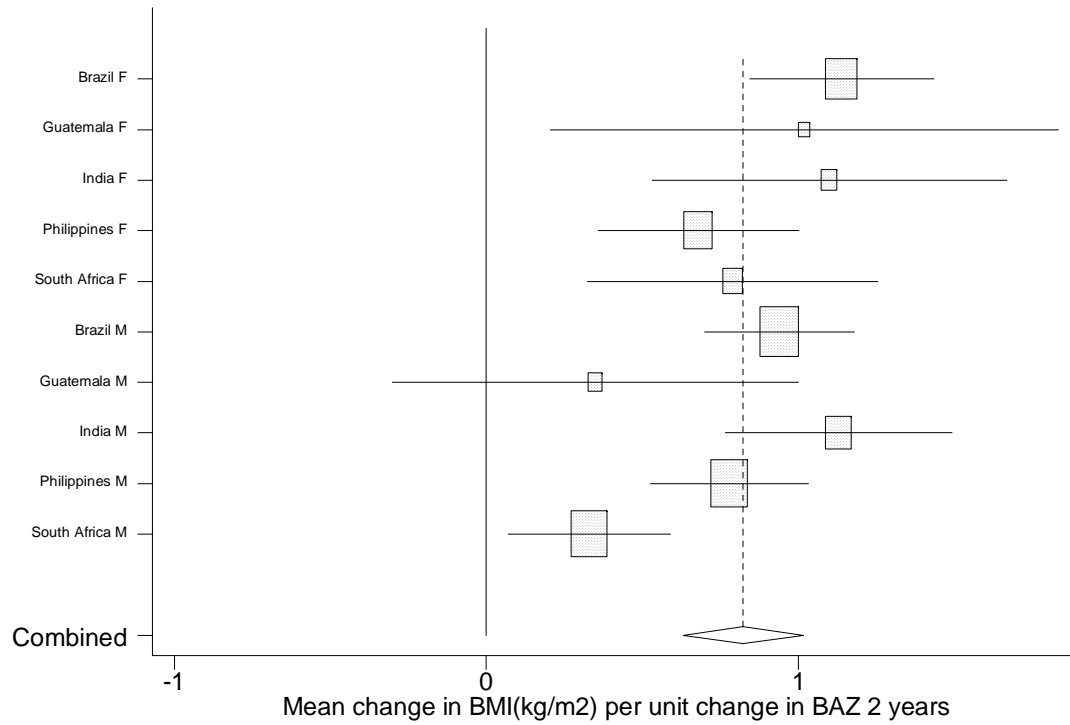

Webfigure 3f. Effect of body mass index for age Z-score at 2 years on body mass index in adulthood – meta-analyses of five studies stratified by sex.

P value < 0.001 (random effects)
