# Supplementary material
Source: PubMed Central journal article supplement (PMC2258311)
Supplement: mmc4.pdf [file mmc4.pdf]

Webtable 1a. Attained height (cm) for males in the five study sites, according to indicators of maternal and child undernutrition: regression analyses.

| Exposure                 | Brazil (Pelotas)     |        | Guatemala (4 villages) |        | India (New Delhi)    |        | Philippines (Cebu) |        | South Africa (Soweto) |        |
|--------------------------|----------------------|--------|------------------------|--------|----------------------|--------|--------------------|--------|-----------------------|--------|
|                          | Coef(95%CI)          | P      | Coef(95%CI)            | P      | Coef(95%CI)          | P      | Coef(95%CI)        | P      | Coef(95%CI)           | P      |
| Maternal height (cm)     |                      |        |                        |        |                      |        |                    |        |                       |        |
| Crude                    | 0.59 (0.54; 0.63)    | <0.001 | 0.62 (0.52; 0.71)      | <0.001 | N/A                  |        | 0.58(0.52;0.64)    | <0.001 | 0.18 (0.11; 0.24)     | <0.001 |
| Adjusted <sup>a</sup>    | 0.54 (0.49; 0.58)    | <0.001 | 0.59 (0.49; 0.69)      | <0.001 | N/A                  |        | 0.55(0.49;0.61)    | <0.001 | 0.16 (0.09; 0.22)     | <0.001 |
| Birthweight (kg)         |                      |        |                        |        |                      |        |                    |        |                       |        |
| Crude                    | 3.90 (3.35; 4.45)    | <0.001 | 4.93 (3.56; 6.31)      | <0.001 | 2.91 (1.93; 3.89)    | <0.001 | 3.01(2.21;3.82)    | <0.001 | 4.25 (3.00; 5.50)     | <0.001 |
| Adjusted <sup>a</sup>    | 3.41 (2.87; 3.95)    | <0.001 | 4.31 (2.91; 5.72)      | <0.001 | 2.72 (1.74; 3.69)    | <0.001 | 2.80(2.02;3.59)    | <0.001 | 3.56 (2.41; 4.70)     | <0.001 |
| IUGR                     |                      |        |                        |        |                      |        |                    |        |                       |        |
| Crude                    | -3.89 (-4.82; -2.97) | <0.001 | -3.70 (-5.43; -1.97)   | <0.001 | -1.69 (-2.61; -0.78) | <0.001 | -1.61(-2.45;-0.77) | <0.001 | -3.20 (-5.04;-1.36)   | <0.001 |
| Adjusted <sup>a</sup>    | -3.32 (-4.21; -2.42) | <0.001 | -2.45 (-4.22; -0.67)   | 0.007  | -1.66 (-2.57; -0.75) | <0.001 | -1.44(-2.26;-0.62) | 0.001  | -2.65 (-4.32; -0.98)  | <0.001 |
| WAZ 2 years <sup>b</sup> |                      |        |                        |        |                      |        |                    |        |                       |        |
| Crude                    | 3.12 (2.88; 3.36)    | <0.001 | 2.76 (2.11; 3.42)      | <0.001 | 2.79 (2.43; 3.15)    | <0.001 | 2.95(2.62;3.28)    | <0.001 | 2.24 (1.68; 2.80)     | <0.001 |
| Adjusted <sup>a</sup>    | 2.86 (2.61; 3.10)    | <0.001 | 2.70 (2.01; 3.38)      | <0.001 | 2.78 (2.40; 3.15)    | <0.001 | 2.83(2.49;3.18)    | <0.001 | 1.83 (1.23; 2.42)     | <0.001 |
| HAZ 2 years <sup>b</sup> |                      |        |                        |        |                      |        |                    |        |                       |        |
| Crude                    | 3.40 (3.21; 3.58)    | <0.001 | 3.38 (2.89; 3.87)      | <0.001 | 3.15 (2.85; 3.45)    | <0.001 | 3.26(3.02;3.52)    | <0.001 | 3.53 (3.04; 4.08)     | <0.001 |
| Adjusted <sup>a</sup>    | 3.31 (3.11; 3.51)    | <0.001 | 3.22 (2.72; 3.72)      | <0.001 | 3.15 (2.84; 3.46)    | <0.001 | 3.30(3.03;3.57)    | <0.001 | 3.13 (2.59; 3.67)     | <0.001 |
| BAZ 2 years <sup>b</sup> |                      |        |                        |        |                      |        |                    |        |                       |        |
| Crude                    | 0.64 (0.34; 0.95)    | <0.001 | -1.12 (-1.92; -0.32)   | 0.006  | 0.44 (0.02; 0.86)    | 0.04   | 0.01(-0.36;0.38)   | 0.96   | 0.02 (-0.44; 0.48)    | 0.93   |
| Adjusted <sup>a</sup>    | 0.51 (0.21; 0.80)    | 0.001  | -1.39 (-2.19; -0.58)   | 0.001  | 0.42 (0.01; 0.84)    | 0.05   | -0.03(-0.39;0.34)  | 0.89   | 0.00 (-0.47; 0.57)    | 1.00   |

(a) Adjusted for socioeconomic status at birth, maternal education, and age at follow-up. In India, paternal education was used instead of maternal education. In South Africa, pubertal status was also adjusted for.

(b) Weight for age (WAZ), height for age (HAZ) and body mass index for age (BAZ) Z-scores according to the 2006 World Health Organization Standards.

Webtable 1b. Attained height (cm) for females in the five study sites, according to indicators of maternal and child undernutrition: regression analyses.

| Exposure                    | Brazil (Pelotas)     |        | Guatemala (4 villages) |        | India (New Delhi)    |        | Philippines (Cebu) |        | South Africa (Soweto) |        |
|-----------------------------|----------------------|--------|------------------------|--------|----------------------|--------|--------------------|--------|-----------------------|--------|
|                             | Coef(95%CI)          | P      | Coef(95%CI)            | P      | Coef(95%CI)          | P      | Coef(95%CI)        | P      | Coef(95%CI)           | P      |
| Maternal height (cm)        |                      |        |                        |        |                      |        |                    |        |                       |        |
| Crude                       | 0.56 (0.52; 0.60)    | <0.001 | 0.51 (0.43; 0.59)      | <0.001 | N/A                  |        | 0.52(0.46;0.58)    | <0.001 | 0.46 (0.39; 0.53)     | <0.001 |
| Adjusted <sup>a</sup>       | 0.54 (0.49; 0.58)    | <0.001 | 0.49 (0.40; 0.57)      | <0.001 | N/A                  |        | 0.50(0.43;0.56)    | <0.001 | 0.46 (0.37; 0.55)     | <0.001 |
| Birthweight (kg)            |                      |        |                        |        |                      |        |                    |        |                       |        |
| Crude                       | 3.47 (2.94; 4.00)    | <0.001 | 3.47 (2.12; 4.82)      | <0.001 | 3.72 (2.52; 4.93)    | <0.001 | 3.78(2.97;4.60)    | <0.001 | 3.15 (2.05; 4.26)     | <0.001 |
| Adjusted <sup>a</sup>       | 3.07 (2.55; 3.59)    | <0.001 | 3.21 (1.84; 4.57)      | <0.001 | 3.49 (2.30; 4.69)    | <0.001 | 3.64(2.83;4.44)    | <0.001 | 3.06 (1.95; 4.17)     | <0.001 |
| IUGR                        |                      |        |                        |        |                      |        |                    |        |                       |        |
| Crude                       | -2.84 (-3.72; -1.96) | <0.001 | -1.86 (-3.46; -0.27)   | 0.02   | -2.30 (-3.30; -1.31) | <0.001 | -2.49(-3.38;-1.60) | <0.001 | -2.60 (-4.28; -0.93)  | 0.002  |
| Adjusted <sup>a</sup>       | -2.38 (-3.25; -1.52) | <0.001 | -1.81 (-3.41; -0.20)   | 0.03   | -2.17 (-3.15; -1.19) | <0.001 | -2.45(-3.33;-1.57) | <0.001 | -2.60 (-4.28; -0.92)  | 0.002  |
| WAZ at 2 years <sup>b</sup> |                      |        |                        |        |                      |        |                    |        |                       |        |
| Crude                       | 2.82 (2.58; 3.06)    | <0.001 | 2.56 (2.00; 3.12)      | <0.001 | 2.65 (2.29; 3.01)    | <0.001 | 2.87(2.57;3.18)    | <0.001 | 1.74 (1.11; 2.38)     | <0.001 |
| Adjusted <sup>a</sup>       | 2.64 (2.39; 2.89)    | <0.001 | 2.70 (2.06; 3.34)      | <0.001 | 2.63 (2.25; 3.02)    | <0.001 | 2.81(2.48;3.12)    | <0.001 | 1.73 (1.09; 2.37)     | <0.001 |
| HAZ at 2 years <sup>a</sup> |                      |        |                        |        |                      |        |                    |        |                       |        |
| Crude                       | 3.28 (3.10; 3.46)    | <0.001 | 3.43 (2.92; 3.95)      | <0.001 | 3.10 (2.78; 3.41)    | <0.001 | 3.10(2.84;3.37)    | <0.001 | 2.78 (2.36; 3.20)     | <0.001 |
| Adjusted <sup>a</sup>       | 3.30 (3.10; 3.49)    | <0.001 | 3.50 (2.95; 4.06)      | <0.001 | 3.13 (2.80; 3.46)    | <0.001 | 3.11(2.84;3.37)    | <0.001 | 2.92 (2.32; 3.52)     | <0.001 |
| BAZ at 2 years <sup>a</sup> |                      |        |                        |        |                      |        |                    |        |                       |        |
| Crude                       | 0.35 (0.05; 0.64)    | 0.02   | -0.07 (-0.78; 0.64)    | 0.84   | 0.58 (0.12; 1.04)    | 0.01   | 0.33(-0.08;0.74)   | 0.12   | -0.05 (-0.42; 0.32)   | 0.86   |
| Adjusted <sup>a</sup>       | 0.16 (-0.13; 0.45)   | 0.27   | -0.39 (-1.12; 0.35)    | 0.31   | 0.40 (-0.05; 0.86)   | 0.08   | 0.28(-0.12;0.69)   | 0.18   | -0.01 (-0.51; 0.50)   | 0.97   |

(a) Adjusted for socioeconomic status at birth, maternal education, and age at follow-up. In India, paternal education was used instead of maternal education. In South Africa, pubertal status was also adjusted for.

(b) Weight for age (WAZ), height for age (HAZ) and body mass index for age (BAZ) Z-scores according to the 2006 World Health Organization Standards.
