# Supplementary material
Source: PubMed Central journal article supplement (PMC2258311)
Supplement: mmc7.pdf [file mmc7.pdf]

Webtable 4. Birthweight of the first offspring (g) for females in four study sites, according to indicators of maternal and child undernutrition: regression analyses. No information available for South Africa, where the number of births was very small.

| Exposure                 | Brazil (Pelotas)       |        | Guatemala (4 villages) |      | India (New Delhi)     |        | Philippines (Cebu)   |        |
|--------------------------|------------------------|--------|------------------------|------|-----------------------|--------|----------------------|--------|
|                          | Coef(95%CI)            | P      | Coef(95%CI)            | P    | Coef(95%CI)           | P      | Coef(95%CI)          | P      |
| Maternal height (cm)     |                        |        |                        |      |                       |        |                      |        |
| Crude                    | 10.5 (3.4; 17.6)       | 0.004  | 3.9 (-5.7; 13.5)       | 0.43 | N/A                   |        | 12.6 (-2.1;27.3)     | 0.09   |
| Adjusted                 | 8.2 (0.6; 15.8)        | 0.03   | 2.5 (-7.9; 12.8)       | 0.64 | N/A                   |        | 11.9 (-3.5;27.2)     | 0.13   |
| Birthweight (kg)         |                        |        |                        |      |                       |        |                      |        |
| Crude                    | 208.2 (127.6; 288.8)   | <0.001 | 196.5 (33.7; 359.3)    | 0.02 | 205.6 (28.5.4; 382.7) | 0.02   | 319.0 (155.8;482.3)  | <0.001 |
| Adjusted                 | 193.4 (111.5; 275.2)   | <0.001 | 148.3 (-19.2; 315.7)   | 0.08 | 201.0 (24.1; 377.9)   | 0.03   | 293.9 (127.3;460.0)  | <0.001 |
| IUGR                     |                        |        |                        |      |                       |        |                      |        |
| Crude                    | -170.4 (-296.6; -44.1) | 0.008  | -180.1 (-386.3; 26.16) | 0.09 | -45.8 (-192.5; 100.9) | 0.54   | -188.9 (-373.6;-4.3) | 0.15   |
| Adjusted                 | -155.9 (-283.5; -28.3) | 0.02   | -155.6 (-366.5; 55.3)  | 0.15 | -43.6 (-190.3; 103.1) | 0.56   | -173.5 (-361.5;14.5) | 0.07   |
| WAZ 2 years <sup>b</sup> |                        |        |                        |      |                       |        |                      |        |
| Crude                    | 89.1 (49.9; 128.4)     | <0.001 | 44.2 (-24.2; 112.6)    | 0.20 | 101.9 (35.6; 168.1)   | 0.003  | 93.4 (20.4;166.3)    | 0.01   |
| Adjusted                 | 79.4 (38.0; 120.9)     | <0.001 | 31.3 (-46.8; 109.5)    | 0.43 | 94.4 (26.2; 162.6)    | 0.007  | 75.7 (-0.10;151.6)   | 0.50   |
| HAZ 2 years <sup>b</sup> |                        |        |                        |      |                       |        |                      |        |
| Crude                    | 92.4 (58.7; 126.2)     | <0.001 | 55.5 (-10.7; 121.7)    | 0.10 | 104.3 (46.4; 162.2)   | <0.001 | 70.9 (5.1;136.6)     | 0.04   |
| Adjusted                 | 86.2 (49.8; 122.7)     | <0.001 | 42.6 (-31.1; 116.3)    | 0.26 | 97.6 (38.4; 156.9)    | 0.001  | 56.4 (-12.6;125.5)   | 0.11   |
| BAZ 2 years <sup>b</sup> |                        |        |                        |      |                       |        | N=186                |        |
| Crude                    | 20.7 (-23.6; 64.9)     | 0.36   | 2.0 (-77.4; 81.4)      | 0.96 | 10.6 (-59.9; 81.1)    | 0.77   | 44.1(-39.7;127.9)    | 0.30   |
| Adjusted                 | 15.9 (-28.4; 60.1)     | 0.48   | -2.1 (-83.4; 79.2)     | 0.96 | 6.3 (-64.7; 77.3)     | 0.86   | 38.5(-44.8;121.8)    | 0.07   |

(a) Adjusted for socioeconomic status at birth, maternal education, and age at follow-up. In India, paternal education was used instead of maternal education. In South Africa, pubertal status was also adjusted for.

(b) Weight for age (WAZ), height for age (HAZ) and body mass index for age (BAZ) Z-scores according to the 2006 World Health Organization Standards..
