# Supplementary material
Source: PubMed Central journal article supplement (PMC2258311)
Supplement: mmc9.pdf [file mmc9.pdf]

Webtable 6a. Glucose (log<sub>e</sub> mmol/L) for males in four study sites, according to indicators of maternal and child undernutrition: regression analyses. No data available from South Africa.

| Exposure                 | Brazil (Pelotas)        |      | Guatemala (4 villages) |      | India (New Delhi)      |       | Philippines (Cebu)     |      |
|--------------------------|-------------------------|------|------------------------|------|------------------------|-------|------------------------|------|
|                          | Coef(95% CI)            | P    | Coef(95% CI)           | P    | Coef(95% CI)           | P     | Coef(95% CI)           | P    |
| Maternal height (m)      |                         |      |                        |      |                        |       |                        |      |
| Crude                    | 0.030 (-0.085; 0.145)   | 0.61 | 0.055 (-0.176; 0.286)  | 0.66 | N/A                    |       | 0.074 (-0.043; 0.192)  | 0.21 |
| Adjusted 1               | 0.033 (-0.090; 0.157)   | 0.60 | 0.182 (-0.065; 0.428)  | 0.12 | N/A                    |       | 0.071 (-0.050; 0.191)  | 0.25 |
| Adjusted 2               | 0.051 (-0.089; 0.190)   | 0.48 | 0.184 (-0.094; 0.462)  | 0.19 | N/A                    |       | -0.019 (-0.155; 0.117) | 0.78 |
| Birthweight (kg)         |                         |      |                        |      |                        |       |                        |      |
| Crude                    | -0.001 (-0.015; 0.012)  | 0.87 | -0.012 (-0.043; 0.020) | 0.46 | -0.017 (-0.048; 0.013) | 0.26  | 0.004 (-0.009; 0.018)  | 0.53 |
| Adjusted 1               | -0.001 (-0.015; 0.013)  | 0.89 | 0.000 (-0.030; 0.032)  | 0.98 | -0.018 (-0.049; 0.012) | 0.24  | 0.004 (-0.009; 0.018)  | 0.57 |
| Adjusted 2               | -0.003 (-0.017; 0.011)  | 0.66 | -0.001 (-0.036; 0.033) | 0.93 | -0.028 (-0.059; 0.002) | 0.07  | -0.002 (-0.016; 0.012) | 0.81 |
| IUGR                     |                         |      |                        |      |                        |       |                        |      |
| Crude                    | -0.010 (-0.032; 0.012)  | 0.36 | -0.011 (-0.049; 0.026) | 0.55 | -0.002 (-0.030; 0.026) | 0.89  | -0.003 (-0.017; 0.011) | 0.69 |
| Adjusted 1               | -0.010 (-0.032; 0.012)  | 0.35 | -0.030 (-0.070; 0.009) | 0.13 | -0.003 (-0.031; 0.025) | 0.84  | -0.003 (-0.017; 0.011) | 0.69 |
| Adjusted 2               | -0.010 (-0.033; 0.012)  | 0.36 | -0.033 (-0.073; 0.007) | 0.11 | -0.004 (-0.024; 0.032) | 0.77  | 0.000 (-0.015; 0.014)  | 0.99 |
| WAZ 2 years <sup>a</sup> |                         |      |                        |      |                        |       |                        |      |
| Crude                    | -0.004 (-0.010; 0.002)  | 0.23 | -0.014 (-0.030; 0.002) | 0.08 | 0.010 (-0.003; 0.022)  | 0.12  | 0.003 (-0.003; 0.010)  | 0.29 |
| Adjusted 1               | -0.005 (-0.011; 0.002)  | 0.17 | -0.007 (-0.024; 0.010) | 0.39 | 0.014 (0.002; 0.027)   | 0.03  | 0.004 (-0.002; 0.010)  | 0.22 |
| Adjusted 2               | -0.010 (-0.017; -0.002) | 0.01 | -0.007 (-0.026; 0.011) | 0.45 | 0.006 (-0.008; 0.021)  | 0.40  | -0.002 (-0.009; 0.006) | 0.68 |
| HAZ 2 years <sup>a</sup> |                         |      |                        |      |                        |       |                        |      |
| Crude                    | -0.003 (-0.009; 0.002)  | 0.27 | -0.006 (-0.019; 0.007) | 0.37 | 0.013 (0.001; 0.024)   | 0.03  | 0.005 (-0.000; 0.011)  | 0.06 |
| Adjusted 1               | -0.004 (-0.010; 0.002)  | 0.18 | -0.002 (-0.015; 0.012) | 0.81 | 0.015 (0.004; 0.026)   | 0.009 | 0.006 (-0.000; 0.011)  | 0.06 |
| Adjusted 2               | -0.008 (-0.015; -0.000) | 0.05 | -0.002 (-0.018; 0.014) | 0.82 | 0.010 (-0.003; 0.024)  | 0.14  | 0.001 (-0.006; 0.008)  | 0.74 |
| BAZ 2 years <sup>a</sup> |                         |      |                        |      |                        |       |                        |      |
| Crude                    | -0.002 (-0.009; 0.005)  | 0.50 | 0.000 (-0.018; 0.018)  | 0.99 | 0.005 (-0.013; 0.013)  | 0.99  | -0.001 (-0.008; 0.005) | 0.65 |
| Adjusted 1               | -0.003 (-0.010; 0.004)  | 0.47 | 0.005 (-0.014; 0.024)  | 0.59 | 0.004 (-0.009; 0.017)  | 0.53  | -0.001 (-0.007; 0.006) | 0.83 |
| Adjusted 2               | -0.006 (-0.013; 0.001)  | 0.10 | 0.005 (-0.015; 0.024)  | 0.64 | -0.001 (-0.014; 0.012) | 0.88  | -0.002 (-0.008; 0.004) | 0.50 |

(a) Weight for age (WAZ), height for age (HAZ) and body mass index for age (BAZ) Z-scores according to the 2006 World Health Organization Standards.. Adjusted 1: adjusted for age, socioeconomic level at birth or childhood, maternal schooling. Additional adjustment for skin color in Brazil and South Africa Adjusted 2: adjusted for model 1 variables plus body mass index and height in adulthood.

Webtable 6b. Glucose (log<sub>e</sub> mmol/L) for females in four study sites, according to indicators of maternal and child undernutrition: regression analyses. No data available from South Africa.

| Exposure                 | Brazil (Pelotas)       |      | Guatemala (4 villages) |      | India (New Delhi)       |       | Philippines (Cebu)     |      |
|--------------------------|------------------------|------|------------------------|------|-------------------------|-------|------------------------|------|
|                          | Coef(95% CI)           | P    | Coef(95% CI)           | P    | Coef(95% CI)            | P     | Coef(95% CI)           | P    |
| Maternal height (m)      |                        |      |                        |      |                         |       |                        |      |
| Crude                    | 0.041 (-0.075; 0.157)  | 0.49 | 0.013 (-0.311; 0.337)  | 0.94 | N/A                     |       | -0.132(-0.264; -0.001) | 0.05 |
| Adjusted 1               | 0.066 (-0.058; 0.191)  | 0.30 | 0.082 (-0.267; 0.431)  | 0.64 | N/A                     |       | -0.113 (-0.247; 0.021) | 0.10 |
| Adjusted 2               | 0.104 (-0.038; 0.246)  | 0.15 | 0.036 (-0.345; 0.418)  | 0.85 | N/A                     |       | -0.109 (-0.258; 0.040) | 0.15 |
| Birthweight (kg)         |                        |      |                        |      |                         |       |                        |      |
| Crude                    | -0.007 (-0.020; 0.006) | 0.30 | -0.004 (-0.049; 0.041) | 0.87 | -0.005 (-0.039, 0.029)  | 0.78  | -0.012 (-0.028; 0.004) | 0.14 |
| Adjusted 1               | -0.007 (-0.021; 0.006) | 0.29 | -0.002 (-0.050; 0.045) | 0.94 | -0.005 (-0.039, 0.029)  | 0.77  | -0.012 (-0.028; 0.004) | 0.14 |
| Adjusted 2               | -0.010 (-0.024; 0.004) | 0.15 | -0.022 (-0.070; 0.026) | 0.36 | -0.018 (-0.054, 0.017)  | 0.32  | -0.015 (-0.032; 0.002) | 0.09 |
| IUGR                     |                        |      |                        |      |                         |       |                        |      |
| Crude                    | -0.004 (-0.027; 0.018) | 0.72 | -0.025 (-0.070; 0.019) | 0.26 | -0.007 (-0.021, 0.035)  | 0.62  | -0.008 (-0.025; 0.009) | 0.37 |
| Adjusted 1               | -0.004 (-0.027; 0.018) | 0.71 | -0.029 (-0.070; 0.017) | 0.22 | 0.006 (-0.022, 0.035)   | 0.66  | -0.007 (-0.024; 0.009) | 0.39 |
| Adjusted 2               | -0.002 (-0.025; 0.020) | 0.84 | -0.019 (-0.065; 0.027) | 0.41 | 0.014 (-0.015, 0.042)   | 0.36  | -0.007 (-0.024; 0.011) | 0.45 |
| WAZ 2 years <sup>a</sup> |                        |      |                        |      |                         |       |                        |      |
| Crude                    | -0.001 (-0.007; 0.006) | 0.82 | -0.010 (-0.025; 0.006) | 0.22 | -0.004 (-0.016, 0.008)  | 0.53  | -0.003 (-0.009; 0.004) | 0.38 |
| Adjusted 1               | 0.000 (-0.006; 0.007)  | 0.92 | -0.011 (-0.029; 0.006) | 0.20 | -0.004 (-0.016, 0.008)  | 0.52  | -0.002 (-0.009; 0.005) | 0.60 |
| Adjusted 2               | -0.003 (-0.011; 0.005) | 0.48 | -0.019 (-0.039; 0.000) | 0.05 | -0.016 (-0.031, -0.001) | 0.03  | -0.002 (-0.011; 0.006) | 0.53 |
| HAZ 2 years <sup>a</sup> |                        |      |                        |      |                         |       |                        |      |
| Crude                    | -0.002 (-0.008; 0.004) | 0.49 | -0.010 (-0.026; 0.006) | 0.22 | 0.005 (-0.006, 0.016)   | 0.39  | -0.005 (-0.012; 0.001) | 0.08 |
| Adjusted 1               | -0.001 (-0.007; 0.005) | 0.72 | -0.010 (-0.028; 0.008) | 0.26 | 0.005 (-0.007, 0.017)   | 0.38  | -0.005 (-0.011; 0.002) | 0.16 |
| Adjusted 2               | -0.002 (-0.010; 0.006) | 0.58 | -0.016 (-0.038; 0.006) | 0.15 | -0.002 (-0.017, 0.013)  | 0.80  | -0.005 (-0.013; 0.003) | 0.23 |
| BAZ 2 years <sup>a</sup> |                        |      |                        |      |                         |       |                        |      |
| Crude                    | 0.002 (-0.005; 0.009)  | 0.63 | -0.010 (-0.027; 0.008) | 0.29 | -0.013 (-0.025, 0.000)  | 0.05  | 0.003 (-0.005; 0.010)  | 0.48 |
| Adjusted 1               | 0.002 (-0.005; 0.009)  | 0.54 | -0.010 (-0.029; 0.009) | 0.29 | -0.013 (-0.026, 0.000)  | 0.05  | 0.003 (-0.004; 0.011)  | 0.41 |
| Adjusted 2               | -0.001 (-0.009; 0.006) | 0.72 | -0.016 (-0.034; 0.003) | 0.10 | -0.018 (-0.031, -0.004) | 0.009 | -0.001 (-0.007; 0.009) | 0.79 |

(a) Weight for age (WAZ), height for age (HAZ) and body mass index for age (BAZ) Z-scores according to the 2006 World Health Organization Standards..

Adjusted 1: adjusted for age, socioeconomic level at birth or childhood, maternal schooling. Additional adjustment for skin color in Brazil and South Africa

Adjusted 2: adjusted for model 1 variables plus body mass index and height in adulthood.
