# Supplementary material
Source: PubMed Central journal article supplement (PMC2258311)
Supplement: mmc10.pdf [file mmc10.pdf]

Webtable 7a. Systolic blood pressure (mm/Hg) for males in four study sites, according to indicators of maternal and child undernutrition: regression analyses.

| Exposure                 | Brazil (Pelotas)     |        | Guatemala (4 villages) |      | India (New Delhi)    |        | Philippines (Cebu)   |        | South Africa (Soweto) |       |
|--------------------------|----------------------|--------|------------------------|------|----------------------|--------|----------------------|--------|-----------------------|-------|
|                          | Coef(95% CI)         | P      | Coef(95% CI)           | P    | Coef(95% CI)         | P      | Coef(95% CI)         | P      | Coef(95% CI)          | P     |
| Maternal height (cm)     |                      |        |                        |      |                      |        |                      |        |                       |       |
| Crude                    | 0.10 (-0.00; 0.20)   | 0.06   | 0.02 (-0.18; 0.22)     | 0.84 | N/A                  |        | 0.15 (0.02; 0.28)    | 0.03   | 0.18 (-0.03; 0.39)    | 0.09  |
| Adjusted 1               | 0.10 (-0.15; 0.21)   | 0.09   | 0.04 (-0.18; 0.26)     | 0.71 | N/A                  |        | 0.08 (-0.05; 0.21)   | 0.24   | 0.19 (-0.01; 0.40)    | 0.07  |
| Adjusted 2               | 0.03 (-0.09; 0.15)   | 0.60   | -0.10 (-0.33; 0.12)    | 0.37 | N/A                  |        | -0.05 (-0.20; 0.09)  | 0.45   | 0.04 (-0.16; 0.24)    | 0.70  |
| Birthweight (kg)         |                      |        |                        |      |                      |        |                      |        |                       |       |
| Crude                    | -0.82 (-2.02; 0.39)  | 0.18   | 0.29 (-2.24; 2.81)     | 0.82 | -0.65 (-2.48; 1.17)  | 0.48   | -0.46 (-2.00; 1.07)  | 0.56   | 2.55 (-1.02; 6.13)    | 0.16  |
| Adjusted 1               | -0.86 (-2.07; 0.35)  | 0.17   | 0.61 (-2.03; 3.25)     | 0.65 | -0.67 (-2.51; 1.16)  | 0.47   | -0.66 (-2.18; 0.86)  | 0.39   | 1.24 (-2.27; 4.74)    | 0.49  |
| Adjusted 2               | -2.38 (-3.57; -1.18) | <0.001 | -0.24 (-2.89; 2.42)    | 0.86 | -2.01 (-3.73; -0.28) | 0.02   | -1.80 (-3.27; -0.32) | 0.02   | -3.81 (-7.27; -0.34)  | 0.03  |
| IUGR                     |                      |        |                        |      |                      |        |                      |        |                       |       |
| Crude                    | -1.90 (-3.81; 0.14)  | 0.05   | -0.25 (-3.20; 2.70)    | 0.87 | -0.01 (-1.71; 1.70)  | 1.00   | 0.06 (-1.51; 1.63)   | 0.94   | 0.16 (-5.00; 5.32)    | 0.95  |
| Adjusted 1               | -1.76 (-3.68; 0.17)  | 0.07   | -0.44 (-3.58; 2.70)    | 0.78 | 0.01 (-1.70; 1.71)   | 0.99   | 0.10 (-1.45; 1.65)   | 0.90   | 3.28 (-1.82; 8.37)    | 0.21  |
| Adjusted 2               | -0.57 (-2.43; 1.29)  | 0.55   | -0.17 (-3.24; 2.89)    | 0.91 | 1.04 (-0.55; 2.63)   | 0.20   | 0.68 (-0.81; 2.16)   | 0.37   | 6.77 (1.93; 11.62)    | 0.006 |
| WAZ 2 years <sup>a</sup> |                      |        |                        |      |                      |        |                      |        |                       |       |
| Crude                    | 0.50 (-0.08; 1.07)   | 0.09   | 0.38 (-1.00; 1.76)     | 0.59 | 1.40 (0.66, 2.13)    | <0.001 | 1.45 (0.77; 2.13)    | <0.001 | 2.01 (0.13; 3.89)     | 0.04  |
| Adjusted 1               | 0.55 (-0.05; 1.15)   | 0.07   | 0.79 (-0.71; 2.29)     | 0.30 | 1.42 (0.67, 2.18)    | <0.001 | 1.11 (0.39; 1.82)    | 0.002  | 1.86 (-0.31; 3.74)    | 0.05  |
| Adjusted 2               | -1.10 (-1.76; -0.45) | 0.001  | -0.30 (-1.82; 1.22)    | 0.70 | -0.47 (-1.30, 0.36)  | 0.27   | -0.50 (-1.30; 0.31)  | 0.23   | -0.77 (-2.73; 1.19)   | 0.44  |
| HAZ 2 years <sup>a</sup> |                      |        |                        |      |                      |        |                      |        |                       |       |
| Crude                    | 0.52 (0.03; 1.02)    | 0.04   | 0.87 (-0.36; 2.11)     | 0.17 | 0.98 (0.32, 1.64)    | 0.004  | 1.50 (0.91; 2.08)    | <0.001 | 2.34 (0.46; 4.21)     | 0.02  |
| Adjusted 1               | 0.62 (0.08; 1.15)    | 0.02   | 1.00 (-0.30; 2.30)     | 0.13 | 1.00 (0.31, 1.68)    | 0.005  | 1.18 (0.55; 1.80)    | <0.001 | 2.93 (1.02; 4.84)     | 0.003 |
| Adjusted 2               | -0.32 (-0.95; 0.32)  | 0.33   | 0.53 (-0.96; 2.02)     | 0.48 | -0.30 (-1.08, 0.48)  | 0.46   | 0.41 (-0.35; 1.17)   | 0.29   | -0.96 (-3.16; 1.24)   | 0.39  |
| BAZ 2 years <sup>a</sup> |                      |        |                        |      |                      |        |                      |        |                       |       |
| Crude                    | 0.12 (-0.52; 0.76)   | 0.71   | -1.33 (-2.87; 0.21)    | 0.09 | 0.99 (0.24, 1.74)    | 0.01   | 0.18 (-0.51; 0.86)   | 0.61   | 0.48 (-0.97; 1.92)    | 0.52  |
| Adjusted 1               | 0.13 (-0.52; 0.77)   | 0.70   | -1.02 (-2.65; 0.61)    | 0.22 | 0.98 (0.21, 1.73)    | 0.01   | 0.13 (-0.55; 0.81)   | 0.70   | 0.07 (-1.37; 1.50)    | 0.93  |
| Adjusted 2               | -1.11 (-1.73; -0.48) | 0.001  | -1.26 (-2.78; 0.25)    | 0.10 | -0.26 (-0.99, 0.48)  | 0.49   | -0.79 (-1.45; -0.13) | 0.02   | -0.22 (-1.60; 1.16)   | 0.76  |

(a) Weight for age (WAZ), height for age (HAZ) and body mass index for age (BAZ) Z-scores according to the 2006 World Health Organization Standards.

Adjusted 1: adjusted for age, socioeconomic level at birth or childhood, maternal schooling. Additional adjustment for skin color in Brazil and South Africa

Adjusted 2: adjusted for model 1 variables plus body mass index and height in adulthood.

Webtable 7b. Systolic blood pressure (mm/Hg) for females in the five study sites, according to indicators of maternal and child undernutrition: regression analyses.

| Exposure                 | Brazil (Pelotas)     |       | Guatemala (4 villages) |       | India (New Delhi)   |      | Philippines (Cebu)  |      | South Africa (Soweto) |      |
|--------------------------|----------------------|-------|------------------------|-------|---------------------|------|---------------------|------|-----------------------|------|
|                          | Coef(95%CI)          | P     | Coef(95%CI)            | P     | Coef(95%CI)         | P    | Coef(95%CI)         | P    | Coef(95%CI)           | P    |
| Maternal height (cm)     |                      |       |                        |       |                     |      |                     |      |                       |      |
| Crude                    | 0.00 (-0.10; 0.10)   | 1.00  | 0.18 (-0.04; 0.39)     | 0.10  | N/A                 |      | 0.02 (-0.11; 0.14)  | 0.81 | 0.25 (-0.13; 0.51)    | 0.06 |
| Adjusted 1               | 0.02 (-0.10; 0.13)   | 0.79  | 0.16 (-0.06; 0.39)     | 0.15  | N/A                 |      | 0.04 (-0.09; 0.17)  | 0.54 | 0.24 (-0.01; 0.48)    | 0.06 |
| Adjusted 2               | -0.09 (-0.21; 0.03)  | 0.15  | 0.08 (-0.14; 0.31)     | 0.46  | N/A                 |      | -0.04 (-0.17; 0.10) | 0.61 | 0.10 (-0.18; 0.38)    | 0.50 |
| Birthweight (kg)         |                      |       |                        |       |                     |      |                     |      |                       |      |
| Crude                    | -0.56 (-1.72; 0.61)  | 0.35  | 3.14 (0.06; 6.23)      | 0.05  | 0.42 (-2.01, 2.85)  | 0.73 | 0.15 (-1.39; 1.69)  | 0.85 | 0.44 (-2.3; 3.18)     | 0.75 |
| Adjusted 1               | -0.41 (-1.59; 0.77)  | 0.50  | 2.98 (-0.13; 6.10)     | 0.06  | 0.54 (-1.91, 2.98)  | 0.67 | 0.25 (-1.31; 1.80)  | 0.76 | -0.51 (-3.10; 2.08)   | 0.70 |
| Adjusted 2               | -1.82 (-3.00; -0.65) | 0.002 | -0.08 (-2.92; 2.75)    | 0.95  | -0.68 (-3.16, 1.79) | 0.59 | -1.52 (-3.05; 0.02) | 0.05 | -1.64 (-4.33; 1.04)   | 0.23 |
| IUGR                     |                      |       |                        |       |                     |      |                     |      |                       |      |
| Crude                    | 1.31 (-0.61; 3.23)   | 0.18  | -1.10 (-4.57; 2.36)    | 0.53  | -1.32 (-3.27, 0.64) | 0.19 | 0.45 (-1.19; 2.09)  | 0.59 | -1.59 (-5.69; 2.50)   | 0.45 |
| Adjusted 1               | 1.17 (-0.76; 3.11)   | 0.24  | -1.30 (-4.74; 2.15)    | 0.46  | -1.40 (-3.37, 0.56) | 0.16 | 0.37 (-1.27; 2.02)  | 0.66 | -0.04 (-3.91; 3.83)   | 0.99 |
| Adjusted 2               | 1.78 (-0.10; 3.65)   | 0.06  | 1.05 (-2.02; 4.11)     | 0.50  | -0.87 (-2.82, 1.09) | 0.39 | 1.52 (-0.05; 3.09)  | 0.06 | 0.86 (-3.04; 4.76)    | 0.67 |
| WAZ 2 years <sup>a</sup> |                      |       |                        |       |                     |      |                     |      |                       |      |
| Crude                    | 0.79 (0.22; 1.37)    | 0.007 | 1.70 (0.43; 2.96)      | 0.009 | -0.01 (-0.84, 0.83) | 0.99 | 0.37 (-0.30; 1.03)  | 0.28 | 0.84 (-0.74; 2.42)    | 0.30 |
| Adjusted 1               | 1.02 (0.41; 1.64)    | 0.001 | 1.70 (0.27; 3.12)      | 0.02  | 0.03 (-0.86, 0.91)  | 0.96 | 0.55 (-0.14; 1.23)  | 0.12 | -0.07 (-1.65; 1.51)   | 0.93 |
| Adjusted 2               | -0.26 (-0.93; 0.42)  | 0.46  | 0.72 (-0.72 ; 2.17)    | 0.32  | -0.92 (-1.94, 0.10) | 0.08 | -0.68 (-1.45; 0.10) | 0.09 | -0.82 (-2.61; 0.97)   | 0.37 |
| HAZ 2 years <sup>a</sup> |                      |       |                        |       |                     |      |                     |      |                       |      |
| Crude                    | 0.55 (0.05; 1.05)    | 0.03  | 1.97 (0.67; 3.27)      | 0.003 | -0.01 (-0.81, 0.79) | 0.98 | 0.33 (-0.26; 0.93)  | 0.27 | 0.23 (-1.36; 1.82)    | 0.78 |
| Adjusted 1               | 0.78 (0.23; 1.32)    | 0.005 | 2.09 (0.71; 3.47)      | 0.003 | 0.02 (-0.83, 0.87)  | 0.96 | 0.51 (-0.11; 1.14)  | 0.11 | -0.17 (-1.74; 1.41)   | 0.84 |
| Adjusted 2               | 0.03 (-0.62; 0.68)   | 0.93  | 2.67 (1.15; 4.19)      | 0.001 | -0.38 (-1.42, 0.67) | 0.48 | -0.30 (-1.05; 0.45) | 0.43 | -1.67 (-3.54; 0.21)   | 0.08 |
| BAZ 2 years <sup>a</sup> |                      |       |                        |       |                     |      |                     |      |                       |      |
| Crude                    | 0.60 (-0.04; 1.23)   | 0.06  | 0.41 (-1.02; 1.85)     | 0.57  | -0.01 (-0.92, 0.90) | 0.98 | 0.16 (-0.60; 0.92)  | 0.69 | 0.56 (-0.61; 1.74)    | 0.35 |
| Adjusted 1               | 0.65 (0.01; 1.29)    | 0.05  | -0.02 (-1.53; 1.49)    | 0.98  | 0.01 (-0.92, 0.93)  | 0.99 | 0.20 (-0.57; 0.96)  | 0.61 | 0.03 (-1.15; 1.20)    | 0.96 |
| Adjusted 2               | -0.31 (-0.94; 0.31)  | 0.33  | -1.19 (-2.54; 0.16)    | 0.08  | -0.70 (-1.62, 0.22) | 0.14 | -0.58 (-1.31; 0.15) | 0.12 | 0.11 (-1.11; 1.32)    | 0.86 |

(a) Weight for age (WAZ), height for age (HAZ) and body mass index for age (BAZ) Z-scores according to the 2006 World Health Organization Standards..

Adjusted 1: adjusted for age, socioeconomic level at birth or childhood, maternal schooling. Additional adjustment for skin color in Brazil and South Africa

Adjusted 2: adjusted for model 1 variables plus body mass index and height in adulthood.
